# Supplementary material for: Learning to Reflect Together: A Video Reflexive Ethnography and Linguistic Analysis of Collaborative Clinical Reasoning in Intensive Care
Source: Research Square preprint supplement (doi:10.21203/rs.3.rs-8488427/v1), 2026-02-09
Supplement: Supplementary file 1 [file f43fcda2c8bfafe936dbfbc6.docx]

Supplementary File 1.

Semi-Structured Interview Guide for Reflective and Retrospective Think-Aloud Sessions

# Purpose of the Interview Guide

This semi-structured interview guide was developed specifically for the present study to support reflective and retrospective think-aloud sessions following video-recorded multidisciplinary intensive care unit (ICU) bedside rounds. The guide was designed to elicit participants’ reasoning processes, epistemic stances, and perceptions of collaborative clinical reasoning (CCR) while reviewing selected video excerpts of their own clinical practice. Facilitators used follow-up prompts as needed to support participants who initially provided descriptive rather than reflective responses.

# Instructions for Participants

Participants were informed that:

- The purpose of the session was reflection and learning, not performance evaluation.
- There were no right or wrong answers.
- They could pause, replay, or skip any video segment at any time.
- They could choose not to comment on any segment if they felt uncomfortable.

Participants were encouraged to verbalize their thoughts as naturally as possible while viewing the video clips.

# Interview Structure

The interview guide was used flexibly, allowing facilitators to follow participants’ reflections while ensuring coverage of key domains relevant to collaborative clinical reasoning.

## Section A. Initial Orientation

1. Before watching the video, how would you describe your general role during ICU rounds?
2. What are you usually paying attention to when participating in team discussions during rounds?

## Section B. Retrospective Think-Aloud While Viewing Video Clips

Participants were asked to verbalize their thoughts while watching selected video excerpts.

Prompts included:

1. What were you thinking at this moment?
2. What information were you focusing on when you made this comment or decision?
3. What clinical concerns or uncertainties were most salient to you here?
4. Were you considering any alternative explanations or plans at this point?

## Section C. Reasoning and Decision-Making

After viewing specific segments, participants were invited to elaborate on their reasoning:

1. How did you arrive at this diagnostic or management decision?
2. What clinical data or cues were most influential in your thinking?
3. Did your reasoning change as the discussion progressed? If so, how?
4. Were there moments when you felt uncertain or hesitant? What contributed to that?

## Section D. Collaborative Clinical Reasoning and Team Interaction

This section focused on interprofessional dynamics and shared reasoning:

1. How did input from other team members influence your thinking?
2. Were there perspectives that you found particularly helpful or surprising?
3. Did you feel comfortable expressing uncertainty or questioning others during this interaction?
4. How would you describe the balance of participation among team members in this discussion?
5. Were there any thoughts or concerns you had at the time that you chose not to voice? What influenced that decision?

## Section E. Language, Communication, and Epistemic Stance

Participants were encouraged to reflect on their communicative choices:

1. How would you describe the way you communicated your reasoning in this interaction?
2. Do you notice any patterns in how certainty, doubt, or confidence were expressed?
3. Were there moments when language facilitated or constrained shared understanding?
4. If you were to participate in a similar discussion again, would you communicate anything differently?

## Section F. Reflection and Learning

To support reflective learning, participants were asked:

1. What did you notice about your own reasoning or communication after watching this video?
2. Did anything surprise you about how the team reasoned together?
3. Has this reflection changed how you think about collaborative clinical reasoning?
4. Are there aspects of your future practice that you might approach differently as a result?

## Closing Question

1. Is there anything else you would like to reflect on regarding this interaction or your role in team-based clinical reasoning?

# Notes on Use

- The guide was used as a flexible framework rather than a rigid script.
- Not all questions were asked in every session.
- Facilitators adapted prompts based on participants’ roles, the content of video clips, and the flow of reflection.

# Language of the Interview Guide

The original interview guide was developed and conducted in Mandarin Chinese (Traditional Chinese), reflecting local linguistic and cultural practices in the Taiwanese clinical context. The English version provided in this supplementary file was translated for publication and transparency purposes. Translation was undertaken by bilingual members of the research team with expertise in medical education and clinical practice to ensure conceptual and contextual equivalence.
